# Supplementary material
Source: publisher figshare collection journal article supplement (https://acs.figshare.com/ndownloader/files/5679084)
Supplement: Supplementary file 1 [file 5679084]

# cm010688u.cif

#============================================================================
_publ_contact_author_name           'Xiao-Zeng You'
_publ_contact_author_address
;
      Coordination Chemistry Institute
      Nanjing University
      Nanjing, 210093
      P.R. China
;
_publ_contact_author_email       'sklc@netra.nju.edu.cn'
_publ_contact_author_fax          '+86-25-3314502'
_publ_requested_journal            'Chem. Mater.'
#============================================================================

_publ_section_title
;
A Novel Bis(trans-thiocyanate)iron(II) Spin Transition Molecular Material
with Bidentate Triaryltriazole Ligands and its Bis(cis-thiocyanate)iron(II)
High-spin Isomer
;
loop_
_publ_author_name
_publ_author_address

;     'Dunru Zhu, Yan Xu, Zhi Yu, Zijian Guo, Xiaozeng You*'
      Coordination Chemistry Institute
      Nanjing University
      Nanjing, 210093
      P. R. China
;
     'Hai Sang'
;     National Laboratory of Solid State Microstructures
      Nanjing University
      Nanjing, 210093
      P.R. China
;
#============================================================================

data_Complex 1

_audit_creation_method            SHELXL-97
_chemical_name_systematic
;
?
;
_chemical_name_common          ?
_chemical_melting_point           ?
_chemical_formula_moiety        ?
_chemical_formula_sum
'C40 H30 Fe N12 S2'
_chemical_formula_weight          798.73

loop_
_atom_type_symbol
_atom_type_description
_atom_type_scat_dispersion_real
_atom_type_scat_dispersion_imag
_atom_type_scat_source
'C'  'C'   0.0033   0.0016
'International Tables Vol C Tables 4.2.6.8 and 6.1.1.4'
'H'  'H'   0.0000   0.0000
'International Tables Vol C Tables 4.2.6.8 and 6.1.1.4'
'N'  'N'   0.0061   0.0033
'International Tables Vol C Tables 4.2.6.8 and 6.1.1.4'
'S'  'S'   0.1246   0.1234
'International Tables Vol C Tables 4.2.6.8 and 6.1.1.4'
'Fe'  'Fe'   0.3463   0.8444
'International Tables Vol C Tables 4.2.6.8 and 6.1.1.4'

_symmetry_cell_setting           'Triclinic'
_symmetry_space_group_name_H-M   'P-1   '

loop_
_symmetry_equiv_pos_as_xyz
'x, y, z'
'-x, -y, -z'

_cell_length_a                    9.120(3)
_cell_length_b                    9.2563(18)
_cell_length_c                    11.576(2)
_cell_angle_alpha               76.256(15)
_cell_angle_beta                 76.405(18)
_cell_angle_gamma             84.983(19)
_cell_volume                      922.1(4)
_cell_formula_units_Z             1
_cell_measurement_temperature    293(2)
_cell_measurement_reflns_used     40
_cell_measurement_theta_min        4.82
_cell_measurement_theta_max       10.01

_exptl_crystal_description        block
_exptl_crystal_colour               red-brown
_exptl_crystal_size_max           0.30
_exptl_crystal_size_mid           0.21
_exptl_crystal_size_min           0.18
_exptl_crystal_density_meas       ?
_exptl_crystal_density_diffrn     1.438
_exptl_crystal_density_method     'not measured'
_exptl_crystal_F_000              412
_exptl_absorpt_coefficient_mu     0.571
_exptl_absorpt_correction_type    'empirical'
_exptl_absorpt_correction_T_min   0.3276
_exptl_absorpt_correction_T_max    0.3632
_exptl_absorpt_process_details    ?

_exptl_special_details
;
?
;

_diffrn_ambient_temperature       293(2)
_diffrn_radiation_wavelength      0.71073
_diffrn_radiation_type           'MoK\a'
_diffrn_radiation_source         'sealed tube'
_diffrn_radiation_monochromator  'graphite'
_diffrn_measurement_device_type  'Bruker P4'
_diffrn_measurement_method       '2\q/\w scans'
_diffrn_detector_area_resol_mean ?
_diffrn_standards_number          3
_diffrn_standards_interval_count  97
_diffrn_standards_decay_%         10.63
_diffrn_reflns_number             3902
_diffrn_reflns_av_R_equivalents   0.1048
_diffrn_reflns_av_sigmaI/netI     0.0733
_diffrn_reflns_limit_h_min        -1
_diffrn_reflns_limit_h_max        10
_diffrn_reflns_limit_k_min        -10
_diffrn_reflns_limit_k_max        10
_diffrn_reflns_limit_l_min        -13
_diffrn_reflns_limit_l_max        13
_diffrn_reflns_theta_min          1.86
_diffrn_reflns_theta_max          25.00
_reflns_number_total              3226
_reflns_number_gt                 2492
_reflns_threshold_expression      >2sigma(I)

_computing_data_collection        'Siemens XSCANS'
_computing_cell_refinement        'Siemens XSCANS'
_computing_data_reduction         'SHELXS-97 (Sheldrick, 1997)'
_computing_structure_solution     'SHELXS-97'
_computing_structure_refinement   'SHELXTL-97'
_computing_molecular_graphics     'SHELXTL-97'
_computing_publication_material   'SHELXTL-97'

_refine_special_details
;
Refinement of F^2^ against ALL reflections.  The weighted R-factor wR and
goodness of fit S are based on F^2^, conventional R-factors R are based
on F, with F set to zero for negative F^2^. The threshold expression of
F^2^ > 2sigma(F^2^) is used only for calculating R-factors(gt) etc. and is
not relevant to the choice of reflections for refinement.  R-factors based
on F^2^ are statistically about twice as large as those based on F, and R-
factors based on ALL data will be even larger.
;

_refine_ls_structure_factor_coef  Fsqd
_refine_ls_matrix_type            full
_refine_ls_weighting_scheme       calc
_refine_ls_weighting_details
'calc w=1/[\s^2^(Fo^2^)+(0.0843P)^2^+0.2973P] where P=(Fo^2^+2Fc^2^)/3'
_atom_sites_solution_primary      direct
_atom_sites_solution_secondary    difmap
_atom_sites_solution_hydrogens    geom
_refine_ls_hydrogen_treatment     mixed
_refine_ls_extinction_method      none
_refine_ls_extinction_coef        ?
_refine_ls_number_reflns          3226
_refine_ls_number_parameters      247
_refine_ls_number_restraints      0
_refine_ls_R_factor_all           0.0741
_refine_ls_R_factor_gt            0.0541
_refine_ls_wR_factor_ref          0.1513
_refine_ls_wR_factor_gt           0.1372
_refine_ls_goodness_of_fit_ref    1.029
_refine_ls_restrained_S_all       1.029
_refine_ls_shift/su_max           0.000
_refine_ls_shift/su_mean          0.000

loop_
_atom_site_label
_atom_site_type_symbol
_atom_site_fract_x
_atom_site_fract_y
_atom_site_fract_z
_atom_site_U_iso_or_equiv
_atom_site_adp_type
_atom_site_occupancy
_atom_site_symmetry_multiplicity
_atom_site_calc_flag
_atom_site_refinement_flags
_atom_site_disorder_assembly
_atom_site_disorder_group
Fe1 Fe 0.0000 0.0000 0.0000 0.0336(2) Uani 1 2 d S . .
S1 S 0.05497(13) 0.39405(14) -0.34840(11) 0.0654(4) Uani 1 1 d . . .
N1 N 0.0188(3) 0.0752(3) 0.1636(3) 0.0381(7) Uani 1 1 d . . .
N2 N 0.2291(3) -0.0658(3) 0.0253(2) 0.0344(6) Uani 1 1 d . . .
N3 N 0.3412(3) -0.1555(3) -0.0262(2) 0.0336(6) Uani 1 1 d . . .
N4 N 0.3678(3) -0.1536(3) 0.1585(2) 0.0311(6) Uani 1 1 d . . .
N5 N 0.6095(3) -0.3823(3) 0.1290(3) 0.0445(7) Uani 1 1 d . . .
N6 N 0.0639(4) 0.2037(4) -0.1241(3) 0.0505(8) Uani 1 1 d . . .
C1 C -0.0841(4) 0.1593(4) 0.2229(4) 0.0488(9) Uani 1 1 d . . .
H1A H -0.1685 0.1947 0.1913 0.059 Uiso 1 1 calc R . .
C2 C -0.0714(5) 0.1959(5) 0.3278(4) 0.0578(11) Uani 1 1 d . . .
H2A H -0.1456 0.2552 0.3661 0.069 Uiso 1 1 calc R . .
C3 C 0.0522(5) 0.1441(5) 0.3759(4) 0.0524(10) Uani 1 1 d . . .
H3A H 0.0638 0.1687 0.4465 0.063 Uiso 1 1 calc R . .
C4 C 0.1597(4) 0.0540(4) 0.3171(3) 0.0434(8) Uani 1 1 d . . .
H4A H 0.2436 0.0156 0.3485 0.052 Uiso 1 1 calc R . .
C5 C 0.1396(3) 0.0228(4) 0.2117(3) 0.0337(7) Uani 1 1 d . . .
C6 C 0.2456(3) -0.0649(3) 0.1342(3) 0.0317(7) Uani 1 1 d . . .
C7 C 0.4239(3) -0.2078(3) 0.0552(3) 0.0309(7) Uani 1 1 d . . .
C8 C 0.5562(3) -0.3094(3) 0.0332(3) 0.0318(7) Uani 1 1 d . . .
C9 C 0.6160(4) -0.3252(4) -0.0848(3) 0.0456(9) Uani 1 1 d . . .
H9A H 0.5754 -0.2712 -0.1493 0.055 Uiso 1 1 calc R . .
C10 C 0.7378(4) -0.4232(5) -0.1042(4) 0.0544(10) Uani 1 1 d . . .
H10A H 0.7800 -0.4373 -0.1822 0.065 Uiso 1 1 calc R . .
C11 C 0.7951(4) -0.4986(4) -0.0078(4) 0.0490(9) Uani 1 1 d . . .
H11A H 0.8770 -0.5651 -0.0188 0.059 Uiso 1 1 calc R . .
C12 C 0.7302(4) -0.4751(4) 0.1063(4) 0.0517(10) Uani 1 1 d . . .
H12A H 0.7717 -0.5257 0.1713 0.062 Uiso 1 1 calc R . .
C13 C 0.4193(3) -0.1903(3) 0.2722(3) 0.0305(7) Uani 1 1 d . . .
C14 C 0.3471(3) -0.2990(4) 0.3662(3) 0.0348(7) Uani 1 1 d . . .
H14A H 0.2673 -0.3480 0.3568 0.042 Uiso 1 1 calc R . .
C15 C 0.3945(4) -0.3347(4) 0.4751(3) 0.0382(8) Uani 1 1 d . . .
H15A H 0.3477 -0.4098 0.5384 0.046 Uiso 1 1 calc R . .
C16 C 0.5117(4) -0.2592(4) 0.4906(3) 0.0398(8) Uani 1 1 d . . .
C17 C 0.5812(4) -0.1501(4) 0.3935(3) 0.0465(9) Uani 1 1 d . . .
H17A H 0.6601 -0.0993 0.4023 0.056 Uiso 1 1 calc R . .
C18 C 0.5361(4) -0.1149(4) 0.2839(3) 0.0393(8) Uani 1 1 d . . .
H18A H 0.5839 -0.0417 0.2195 0.047 Uiso 1 1 calc R . .
C19 C 0.5622(3) -0.2969(3) 0.6095(3) 0.0648(12) Uani 1 1 d . . .
H19A H 0.5013 -0.3742 0.6657 0.097 Uiso 1 1 calc R . .
H19B H 0.5512 -0.2101 0.6429 0.097 Uiso 1 1 calc R . .
H19C H 0.6661 -0.3305 0.5956 0.097 Uiso 1 1 calc R . .
C20 C 0.0610(3) 0.2835(3) -0.2177(3) 0.0427(8) Uani 1 1 d R . .

loop_
_atom_site_aniso_label
_atom_site_aniso_U_11
_atom_site_aniso_U_22
_atom_site_aniso_U_33
_atom_site_aniso_U_23
_atom_site_aniso_U_13
_atom_site_aniso_U_12
Fe1 0.0281(4) 0.0364(4) 0.0358(4) -0.0061(3) -0.0118(3) 0.0084(3)
S1 0.0574(7) 0.0708(7) 0.0572(7) 0.0111(5) -0.0162(5) -0.0052(5)
N1 0.0322(14) 0.0396(15) 0.0424(16) -0.0115(12) -0.0099(12) 0.0100(12)
N2 0.0289(14) 0.0405(15) 0.0352(15) -0.0106(12) -0.0120(11) 0.0115(12)
N3 0.0294(14) 0.0398(15) 0.0307(14) -0.0084(11) -0.0074(11) 0.0075(11)
N4 0.0248(13) 0.0380(14) 0.0316(14) -0.0080(11) -0.0109(11) 0.0068(11)
N5 0.0428(17) 0.0503(18) 0.0429(17) -0.0156(14) -0.0162(13) 0.0178(14)
N6 0.0475(18) 0.0453(18) 0.055(2) -0.0013(16) -0.0137(15) -0.0020(14)
C1 0.041(2) 0.050(2) 0.052(2) -0.0147(18) -0.0085(17) 0.0183(16)
C2 0.050(2) 0.063(3) 0.060(3) -0.028(2) -0.0067(19) 0.024(2)
C3 0.060(3) 0.058(2) 0.044(2) -0.0236(19) -0.0097(18) 0.0052(19)
C4 0.044(2) 0.047(2) 0.043(2) -0.0157(16) -0.0130(16) 0.0083(16)
C5 0.0292(16) 0.0342(16) 0.0364(17) -0.0077(13) -0.0074(13) 0.0046(13)
C6 0.0248(15) 0.0357(17) 0.0352(17) -0.0069(13) -0.0106(13) 0.0036(13)
C7 0.0267(15) 0.0360(16) 0.0292(16) -0.0068(13) -0.0066(13) 0.0028(13)
C8 0.0253(15) 0.0337(17) 0.0383(18) -0.0094(14) -0.0106(13) 0.0024(13)
C9 0.0393(19) 0.058(2) 0.0377(19) -0.0140(17) -0.0069(15) 0.0109(17)
C10 0.044(2) 0.066(3) 0.051(2) -0.025(2) 0.0036(18) 0.0076(19)
C11 0.0306(18) 0.046(2) 0.072(3) -0.0222(19) -0.0109(18) 0.0140(16)
C12 0.049(2) 0.050(2) 0.063(3) -0.0174(19) -0.0285(19) 0.0211(18)
C13 0.0245(15) 0.0380(17) 0.0301(16) -0.0102(13) -0.0092(12) 0.0084(13)
C14 0.0266(16) 0.0396(18) 0.0393(18) -0.0121(14) -0.0077(13) 0.0025(13)
C15 0.0408(19) 0.0370(18) 0.0320(17) -0.0052(14) -0.0036(14) 0.0049(14)
C16 0.0436(19) 0.047(2) 0.0329(18) -0.0127(15) -0.0147(15) 0.0055(16)
C17 0.045(2) 0.055(2) 0.046(2) -0.0112(17) -0.0206(17) -0.0078(17)
C18 0.0388(19) 0.0432(19) 0.0339(18) -0.0017(14) -0.0088(14) -0.0078(15)
C19 0.094(3) 0.062(3) 0.045(2) -0.003(2) -0.037(2) -0.006(2)
C20 0.0319(18) 0.0418(19) 0.052(2) -0.0087(17) -0.0074(16) -0.0003(15)

_geom_special_details
;
All esds (except the esd in the dihedral angle between two l.s. planes)
are estimated using the full covariance matrix.  The cell esds are taken
into account individually in the estimation of esds in distances, angles
and torsion angles; correlations between esds in cell parameters are only
used when they are defined by crystal symmetry.  An approximate (isotropic)
treatment of cell esds is used for estimating esds involving l.s. planes.
;

loop_
_geom_bond_atom_site_label_1
_geom_bond_atom_site_label_2
_geom_bond_distance
_geom_bond_site_symmetry_2
_geom_bond_publ_flag
Fe1 N6 2.114(3) . ?
Fe1 N6 2.114(3) 2 ?
Fe1 N2 2.192(2) . ?
Fe1 N2 2.192(2) 2 ?
Fe1 N1 2.213(3) . ?
Fe1 N1 2.213(3) 2 ?
S1 C20 1.622(3) . ?
N1 C1 1.335(4) . ?
N1 C5 1.351(4) . ?
N2 C6 1.306(4) . ?
N2 N3 1.374(4) . ?
N3 C7 1.321(4) . ?
N4 C6 1.368(4) . ?
N4 C7 1.376(4) . ?
N4 C13 1.456(4) . ?
N5 C8 1.328(4) . ?
N5 C12 1.350(5) . ?
N6 C20 1.162(4) . ?
C1 C2 1.368(6) . ?
C2 C3 1.373(6) . ?
C3 C4 1.390(5) . ?
C4 C5 1.374(5) . ?
C5 C6 1.483(4) . ?
C7 C8 1.476(4) . ?
C8 C9 1.384(5) . ?
C9 C10 1.382(5) . ?
C10 C11 1.358(6) . ?
C11 C12 1.374(6) . ?
C13 C18 1.372(5) . ?
C13 C14 1.375(5) . ?
C14 C15 1.384(5) . ?
C15 C16 1.395(5) . ?
C16 C17 1.387(5) . ?
C16 C19 1.506(4) . ?
C17 C18 1.382(5) . ?

loop_
_geom_angle_atom_site_label_1
_geom_angle_atom_site_label_2
_geom_angle_atom_site_label_3
_geom_angle
_geom_angle_site_symmetry_1
_geom_angle_site_symmetry_3
_geom_angle_publ_flag
N6 Fe1 N6 180.0(2) . 2 ?
N6 Fe1 N2 94.52(11) . . ?
N6 Fe1 N2 85.48(11) 2 . ?
N6 Fe1 N2 85.48(11) . 2 ?
N6 Fe1 N2 94.52(11) 2 2 ?
N2 Fe1 N2 180.00(13) . 2 ?
N6 Fe1 N1 95.30(12) . . ?
N6 Fe1 N1 84.70(12) 2 . ?
N2 Fe1 N1 74.17(10) . . ?
N2 Fe1 N1 105.83(10) 2 . ?
N6 Fe1 N1 84.70(12) . 2 ?
N6 Fe1 N1 95.30(12) 2 2 ?
N2 Fe1 N1 105.83(10) . 2 ?
N2 Fe1 N1 74.17(10) 2 2 ?
N1 Fe1 N1 180.00(12) . 2 ?
C1 N1 C5 117.6(3) . . ?
C1 N1 Fe1 125.4(2) . . ?
C5 N1 Fe1 116.9(2) . . ?
C6 N2 N3 109.0(2) . . ?
C6 N2 Fe1 113.0(2) . . ?
N3 N2 Fe1 133.3(2) . . ?
C7 N3 N2 106.5(2) . . ?
C6 N4 C7 104.8(2) . . ?
C6 N4 C13 127.1(3) . . ?
C7 N4 C13 128.0(2) . . ?
C8 N5 C12 116.3(3) . . ?
C20 N6 Fe1 148.3(3) . . ?
N1 C1 C2 123.2(3) . . ?
C1 C2 C3 119.1(3) . . ?
C2 C3 C4 118.8(3) . . ?
C5 C4 C3 118.7(3) . . ?
N1 C5 C4 122.6(3) . . ?
N1 C5 C6 111.3(3) . . ?
C4 C5 C6 126.1(3) . . ?
N2 C6 N4 109.6(3) . . ?
N2 C6 C5 120.9(3) . . ?
N4 C6 C5 129.5(3) . . ?
N3 C7 N4 110.1(3) . . ?
N3 C7 C8 122.7(3) . . ?
N4 C7 C8 127.2(3) . . ?
N5 C8 C9 123.8(3) . . ?
N5 C8 C7 117.5(3) . . ?
C9 C8 C7 118.6(3) . . ?
C10 C9 C8 118.2(3) . . ?
C11 C10 C9 119.2(4) . . ?
C10 C11 C12 118.9(3) . . ?
N5 C12 C11 123.5(3) . . ?
C18 C13 C14 121.7(3) . . ?
C18 C13 N4 119.7(3) . . ?
C14 C13 N4 118.6(3) . . ?
C13 C14 C15 119.2(3) . . ?
C14 C15 C16 120.6(3) . . ?
C17 C16 C15 118.2(3) . . ?
C17 C16 C19 121.1(3) . . ?
C15 C16 C19 120.6(3) . . ?
C18 C17 C16 121.6(3) . . ?
C13 C18 C17 118.6(3) . . ?
N6 C20 S1 179.3(3) . . ?

_diffrn_measured_fraction_theta_max    0.996
_diffrn_reflns_theta_full              25.00
_diffrn_measured_fraction_theta_full   0.996
_refine_diff_density_max    0.575
_refine_diff_density_min   -0.796
_refine_diff_density_rms    0.084
#============================================================================

data_Complex 2

_audit_creation_method            SHELXL-97
_chemical_name_systematic
;
?
;
_chemical_name_common             ?
_chemical_melting_point              ?
_chemical_formula_moiety          ?
_chemical_formula_sum
'C40 H30 Fe N12 S2'
_chemical_formula_weight          798.73

loop_
_atom_type_symbol
_atom_type_description
_atom_type_scat_dispersion_real
_atom_type_scat_dispersion_imag
_atom_type_scat_source
'C'  'C'   0.0033   0.0016
'International Tables Vol C Tables 4.2.6.8 and 6.1.1.4'
'H'  'H'   0.0000   0.0000
'International Tables Vol C Tables 4.2.6.8 and 6.1.1.4'
'N'  'N'   0.0061   0.0033
'International Tables Vol C Tables 4.2.6.8 and 6.1.1.4'
'S'  'S'   0.1246   0.1234
'International Tables Vol C Tables 4.2.6.8 and 6.1.1.4'
'Fe'  'Fe'   0.3463   0.8444
'International Tables Vol C Tables 4.2.6.8 and 6.1.1.4'

_symmetry_cell_setting           'Monoclinic'
_symmetry_space_group_name_H-M   'C2/c  '

loop_
_symmetry_equiv_pos_as_xyz
'x, y, z'
'-x, y, -z+1/2'
'x+1/2, y+1/2, z'
'-x+1/2, y+1/2, -z+1/2'
'-x, -y, -z'
'x, -y, z-1/2'
'-x+1/2, -y+1/2, -z'
'x+1/2, -y+1/2, z-1/2'

_cell_length_a                    21.851(3)
_cell_length_b                    13.4113(15)
_cell_length_c                    16.859(3)
_cell_angle_alpha                 90.00
_cell_angle_beta                  128.153(9)
_cell_angle_gamma                 90.00
_cell_volume                      3885.0(9)
_cell_formula_units_Z             4
_cell_measurement_temperature     293(2)
_cell_measurement_reflns_used     40
_cell_measurement_theta_min       7.27
_cell_measurement_theta_max       12.38

_exptl_crystal_description        block
_exptl_crystal_colour             red
_exptl_crystal_size_max           0.60
_exptl_crystal_size_mid           0.56
_exptl_crystal_size_min           0.40
_exptl_crystal_density_meas       ?
_exptl_crystal_density_diffrn     1.366
_exptl_crystal_density_method     'not measured'
_exptl_crystal_F_000              1648
_exptl_absorpt_coefficient_mu     0.542
_exptl_absorpt_correction_type    'empirical'
_exptl_absorpt_correction_T_min   0.6634
_exptl_absorpt_correction_T_max   0.7113
_exptl_absorpt_process_details    ?

_exptl_special_details
;
?
;

_diffrn_ambient_temperature       293(2)
_diffrn_radiation_wavelength      0.71073
_diffrn_radiation_type            'MoK\a'
_diffrn_radiation_source          'sealed tube'
_diffrn_radiation_monochromator   'graphite'
_diffrn_measurement_device_type   'Siemens P4'
_diffrn_measurement_method        '2\q/\w scans'
_diffrn_detector_area_resol_mean  ?
_diffrn_standards_number          3
_diffrn_standards_interval_count  97
_diffrn_standards_decay_%         7.08
_diffrn_reflns_number             4052
_diffrn_reflns_av_R_equivalents   0.0367
_diffrn_reflns_av_sigmaI/netI     0.0601
_diffrn_reflns_limit_h_min        -1
_diffrn_reflns_limit_h_max        25
_diffrn_reflns_limit_k_min        -1
_diffrn_reflns_limit_k_max        15
_diffrn_reflns_limit_l_min        -20
_diffrn_reflns_limit_l_max        16
_diffrn_reflns_theta_min          1.95
_diffrn_reflns_theta_max          25.01
_reflns_number_total              3412
_reflns_number_gt                 1865
_reflns_threshold_expression      >2sigma(I)

_computing_data_collection        'Siemens XSCANS'
_computing_cell_refinement        'Siemens XSCANS'
_computing_data_reduction         'SHELXTL (Sheldrick, 1997)'
_computing_structure_solution     'SHELXTL'
_computing_structure_refinement   'SHELXTL'
_computing_molecular_graphics     'SHELXTL'
_computing_publication_material   'SHELXTL'

_refine_special_details
;
Refinement of F^2^ against ALL reflections.  The weighted R-factor wR and
goodness of fit S are based on F^2^, conventional R-factors R are based
on F, with F set to zero for negative F^2^. The threshold expression of
F^2^ > 2sigma(F^2^) is used only for calculating R-factors(gt) etc. and is
not relevant to the choice of reflections for refinement.  R-factors based
on F^2^ are statistically about twice as large as those based on F, and R-
factors based on ALL data will be even larger.
;

_refine_ls_structure_factor_coef  Fsqd
_refine_ls_matrix_type            full
_refine_ls_weighting_scheme       calc
_refine_ls_weighting_details
'calc w=1/[\s^2^(Fo^2^)+(0.1129P)^2^+3.5619P] where P=(Fo^2^+2Fc^2^)/3'
_atom_sites_solution_primary      direct
_atom_sites_solution_secondary    difmap
_atom_sites_solution_hydrogens    geom
_refine_ls_hydrogen_treatment     mixed
_refine_ls_extinction_method      SHELXTL
_refine_ls_extinction_coef        0.0116(7)
_refine_ls_extinction_expression
'Fc^*^=kFc[1+0.001xFc^2^\l^3^/sin(2\q)]^-1/4^'
_refine_ls_number_reflns          3412
_refine_ls_number_parameters      250
_refine_ls_number_restraints      12
_refine_ls_R_factor_all           0.1320
_refine_ls_R_factor_gt            0.0697
_refine_ls_wR_factor_ref          0.2265
_refine_ls_wR_factor_gt           0.1789
_refine_ls_goodness_of_fit_ref    1.015
_refine_ls_restrained_S_all       1.021
_refine_ls_shift/su_max           0.010
_refine_ls_shift/su_mean          0.001

loop_
_atom_site_label
_atom_site_type_symbol
_atom_site_fract_x
_atom_site_fract_y
_atom_site_fract_z
_atom_site_U_iso_or_equiv
_atom_site_adp_type
_atom_site_occupancy
_atom_site_symmetry_multiplicity
_atom_site_calc_flag
_atom_site_refinement_flags
_atom_site_disorder_assembly
_atom_site_disorder_group
Fe1 Fe 0.0000 0.20979(5) 0.2500 0.07773(19) Uani 1 2 d S . .
S1 S 0.13642(6) 0.03561(12) 0.15769(9) 0.1629(5) Uani 1 1 d . . .
N1 N 0.10203(11) 0.23388(18) 0.40983(16) 0.0776(7) Uani 1 1 d . . .
N2 N 0.06482(13) 0.3421(2) 0.25363(16) 0.0863(8) Uani 1 1 d . . .
N3 N 0.04217(13) 0.4161(2) 0.18399(17) 0.0922(9) Uani 1 1 d . . .
N4 N 0.12574(12) 0.47818(19) 0.33767(16) 0.0805(8) Uani 1 1 d . A .
N5 N 0.05223(14) 0.1137(2) 0.21357(19) 0.1032(10) Uani 1 1 d . . .
N6 N 0.06713(17) 0.6768(3) 0.23209(19) 0.1152(12) Uani 1 1 d . . .
C1 C 0.12535(16) 0.1699(3) 0.4841(2) 0.0893(11) Uani 1 1 d . . .
H1A H 0.0977 0.1108 0.4681 0.107 Uiso 1 1 calc R . .
C2 C 0.18878(17) 0.1869(3) 0.5843(2) 0.0989(13) Uani 1 1 d . . .
H2A H 0.2026 0.1410 0.6342 0.119 Uiso 1 1 calc R . .
C3 C 0.23048(18) 0.2734(3) 0.6074(2) 0.0979(13) Uani 1 1 d . . .
H3A H 0.2728 0.2874 0.6738 0.118 Uiso 1 1 calc R . .
C4 C 0.20903(17) 0.3387(3) 0.5317(2) 0.0946(12) Uani 1 1 d . . .
H4A H 0.2378 0.3964 0.5459 0.114 Uiso 1 1 calc R . .
C5 C 0.14423(15) 0.3183(2) 0.43403(19) 0.0773(9) Uani 1 1 d . . .
C6 C 0.11396(15) 0.3795(2) 0.34422(19) 0.0791(9) Uani 1 1 d . . .
C7 C 0.07905(15) 0.4977(3) 0.23499(19) 0.0844(10) Uani 1 1 d . . .
C8 C 0.06682(16) 0.5939(3) 0.1869(2) 0.0883(10) Uani 1 1 d . . .
C9 C 0.04962(18) 0.5946(3) 0.0955(2) 0.1104(12) Uani 1 1 d . . .
H9A H 0.0524 0.5363 0.0679 0.132 Uiso 1 1 calc R . .
C10 C 0.0278(2) 0.6835(4) 0.0430(3) 0.1375(17) Uani 1 1 d . . .
H10A H 0.0132 0.6849 -0.0218 0.165 Uiso 1 1 calc R . .
C11 C 0.0276(2) 0.7670(3) 0.0853(3) 0.1215(15) Uani 1 1 d . . .
H11A H 0.0144 0.8275 0.0515 0.146 Uiso 1 1 calc R . .
C12 C 0.0471(2) 0.7622(3) 0.1786(3) 0.1248(16) Uani 1 1 d . . .
H12A H 0.0466 0.8209 0.2076 0.150 Uiso 1 1 calc R . .
C13 C 0.15534(19) 0.5753(3) 0.4786(2) 0.1015(13) Uani 1 1 d . A .
H13A H 0.1065 0.5595 0.4598 0.122 Uiso 1 1 calc R . .
C14 C 0.2073(2) 0.6307(4) 0.5640(3) 0.1353(18) Uani 1 1 d . . .
H14A H 0.1939 0.6526 0.6038 0.162 Uiso 0.274(6) 1 calc PR A 2
C15 C 0.2769(3) 0.6530(4) 0.5898(4) 0.175(3) Uani 1 1 d U A .
H15A H 0.3115 0.6903 0.6478 0.209 Uiso 1 1 calc R . .
C16 C 0.2990(2) 0.6226(4) 0.5335(4) 0.159(2) Uani 1 1 d U . .
H16A H 0.3480 0.6393 0.5531 0.191 Uiso 0.726(6) 1 calc PR A 1
C17 C 0.24752(19) 0.5663(3) 0.4458(3) 0.1152(15) Uani 1 1 d . A .
H17A H 0.2609 0.5450 0.4057 0.138 Uiso 1 1 calc R . .
C18 C 0.17707(16) 0.5441(2) 0.4220(2) 0.0837(11) Uani 1 1 d . . .
C19 C 0.08752(17) 0.0794(2) 0.1904(2) 0.0879(11) Uani 1 1 d . . .
C20 C 0.1882(4) 0.6644(7) 0.6273(6) 0.187(3) Uiso 0.726(6) 1 d P A 1
H20A H 0.2310 0.7016 0.6830 0.280 Uiso 0.726(6) 1 calc PR A 1
H20B H 0.1777 0.6079 0.6523 0.280 Uiso 0.726(6) 1 calc PR A 1
H20C H 0.1429 0.7063 0.5888 0.280 Uiso 0.726(6) 1 calc PR A 1
C20A C 0.3827(7) 0.6237(12) 0.5864(10) 0.115(5) Uiso 0.274(6) 1 d P A 2
H20D H 0.4074 0.6666 0.6442 0.172 Uiso 0.274(6) 1 calc PR A 2
H20E H 0.3929 0.6478 0.5420 0.172 Uiso 0.274(6) 1 calc PR A 2
H20F H 0.4029 0.5573 0.6080 0.172 Uiso 0.274(6) 1 calc PR A 2

loop_
_atom_site_aniso_label
_atom_site_aniso_U_11
_atom_site_aniso_U_22
_atom_site_aniso_U_33
_atom_site_aniso_U_23
_atom_site_aniso_U_13
_atom_site_aniso_U_12
Fe1 0.0834(2) 0.0665(3) 0.0910(3) 0.000 0.05771(19) 0.000
S1 0.1940(5) 0.1498(11) 0.2243(7) -0.0167(7) 0.1689(4) 0.0208(7)
N1 0.0825(9) 0.0688(14) 0.0925(11) 0.0032(10) 0.0596(8) 0.0022(11)
N2 0.0985(11) 0.0846(16) 0.0757(10) -0.0089(12) 0.0538(9) -0.0137(13)
N3 0.1141(12) 0.0858(17) 0.0821(11) -0.0075(12) 0.0633(9) -0.0253(13)
N4 0.0876(10) 0.0763(15) 0.0775(10) -0.0089(11) 0.0510(8) -0.0150(11)
N5 0.0999(12) 0.095(2) 0.1190(15) -0.0162(14) 0.0695(11) -0.0038(14)
N6 0.1461(18) 0.098(2) 0.0957(14) 0.0010(14) 0.0717(13) -0.0129(17)
C1 0.0920(14) 0.0786(19) 0.0967(15) 0.0056(15) 0.0579(11) 0.0053(15)
C2 0.0983(16) 0.090(2) 0.0945(17) 0.0135(16) 0.0527(13) 0.0099(17)
C3 0.0967(16) 0.097(3) 0.0848(16) 0.0020(17) 0.0485(13) 0.0009(18)
C4 0.0935(15) 0.090(2) 0.0897(16) -0.0031(17) 0.0512(13) -0.0065(17)
C5 0.0793(12) 0.0755(18) 0.0763(13) -0.0036(13) 0.0476(10) -0.0024(14)
C6 0.0900(12) 0.0762(19) 0.0837(12) -0.0076(13) 0.0599(9) -0.0116(14)
C7 0.0973(13) 0.084(2) 0.0780(12) -0.0086(14) 0.0572(10) -0.0208(15)
C8 0.1029(14) 0.089(2) 0.0783(13) -0.0140(14) 0.0585(10) -0.0308(15)
C9 0.1583(18) 0.095(2) 0.1001(15) -0.0194(16) 0.0912(13) -0.0443(19)
C10 0.187(3) 0.135(3) 0.0899(17) -0.0115(19) 0.0852(16) -0.062(3)
C11 0.134(2) 0.119(3) 0.0955(18) 0.011(2) 0.0630(16) -0.033(2)
C12 0.162(2) 0.102(3) 0.115(2) 0.005(2) 0.0877(17) -0.001(2)
C13 0.1092(18) 0.102(2) 0.0784(15) -0.0165(16) 0.0504(13) -0.0040(19)
C14 0.148(3) 0.132(3) 0.0966(19) -0.030(2) 0.0609(18) 0.018(3)
C15 0.134(3) 0.152(4) 0.177(4) -0.076(3) 0.065(3) -0.029(3)
C16 0.096(2) 0.147(4) 0.190(4) -0.053(3) 0.067(2) -0.042(3)
C17 0.0983(18) 0.096(3) 0.133(2) -0.015(2) 0.0627(16) -0.0189(19)
C18 0.0828(14) 0.0759(19) 0.0745(14) -0.0087(14) 0.0396(11) -0.0105(15)
C19 0.0897(14) 0.075(2) 0.0984(16) -0.0099(15) 0.0577(12) 0.0035(15)

_geom_special_details
;
All esds (except the esd in the dihedral angle between two l.s. planes)
are estimated using the full covariance matrix.  The cell esds are taken
into account individually in the estimation of esds in distances, angles
and torsion angles; correlations between esds in cell parameters are only
used when they are defined by crystal symmetry.  An approximate (isotropic)
treatment of cell esds is used for estimating esds involving l.s. planes.
;

loop_
_geom_bond_atom_site_label_1
_geom_bond_atom_site_label_2
_geom_bond_distance
_geom_bond_site_symmetry_2
_geom_bond_publ_flag
Fe1 N5 2.051(3) 2 ?
Fe1 N5 2.051(3) . ?
Fe1 N1 2.2166(19) 2 ?
Fe1 N1 2.2166(19) . ?
Fe1 N2 2.248(3) . ?
Fe1 N2 2.248(3) 2 ?
S1 C19 1.586(4) . ?
N1 C1 1.332(4) . ?
N1 C5 1.354(4) . ?
N2 C6 1.308(3) . ?
N2 N3 1.375(4) . ?
N3 C7 1.315(4) . ?
N4 C6 1.365(4) . ?
N4 C7 1.387(3) . ?
N4 C18 1.446(3) . ?
N5 C19 1.154(5) . ?
N6 C8 1.346(5) . ?
N6 C12 1.351(5) . ?
C1 C2 1.390(4) . ?
C2 C3 1.374(5) . ?
C3 C4 1.370(5) . ?
C4 C5 1.382(3) . ?
C5 C6 1.472(4) . ?
C7 C8 1.458(5) . ?
C8 C9 1.343(5) . ?
C9 C10 1.381(5) . ?
C10 C11 1.329(6) . ?
C11 C12 1.354(6) . ?
C13 C18 1.368(6) . ?
C13 C14 1.377(5) . ?
C14 C15 1.332(7) . ?
C14 C20 1.439(10) . ?
C15 C16 1.366(9) . ?
C16 C17 1.403(6) . ?
C16 C20A 1.457(13) . ?
C17 C18 1.362(5) . ?

loop_
_geom_angle_atom_site_label_1
_geom_angle_atom_site_label_2
_geom_angle_atom_site_label_3
_geom_angle
_geom_angle_site_symmetry_1
_geom_angle_site_symmetry_3
_geom_angle_publ_flag
N5 Fe1 N5 102.13(18) 2 . ?
N5 Fe1 N1 97.34(9) 2 2 ?
N5 Fe1 N1 93.17(9) . 2 ?
N5 Fe1 N1 93.17(9) 2 . ?
N5 Fe1 N1 97.34(9) . . ?
N1 Fe1 N1 163.24(13) 2 . ?
N5 Fe1 N2 161.05(11) 2 . ?
N5 Fe1 N2 92.66(12) . . ?
N1 Fe1 N2 93.54(8) 2 . ?
N1 Fe1 N2 73.03(9) . . ?
N5 Fe1 N2 92.66(12) 2 2 ?
N5 Fe1 N2 161.05(11) . 2 ?
N1 Fe1 N2 73.03(9) 2 2 ?
N1 Fe1 N2 93.54(8) . 2 ?
N2 Fe1 N2 75.72(15) . 2 ?
C1 N1 C5 117.5(2) . . ?
C1 N1 Fe1 124.21(19) . . ?
C5 N1 Fe1 118.32(18) . . ?
C6 N2 N3 108.8(3) . . ?
C6 N2 Fe1 112.6(2) . . ?
N3 N2 Fe1 131.17(16) . . ?
C7 N3 N2 106.9(2) . . ?
C6 N4 C7 104.7(2) . . ?
C6 N4 C18 125.7(2) . . ?
C7 N4 C18 129.6(3) . . ?
C19 N5 Fe1 164.5(3) . . ?
C8 N6 C12 115.9(3) . . ?
N1 C1 C2 123.5(3) . . ?
C3 C2 C1 118.2(3) . . ?
C4 C3 C2 119.3(3) . . ?
C3 C4 C5 119.5(3) . . ?
N1 C5 C4 122.0(3) . . ?
N1 C5 C6 111.5(2) . . ?
C4 C5 C6 126.4(3) . . ?
N2 C6 N4 109.7(3) . . ?
N2 C6 C5 120.7(3) . . ?
N4 C6 C5 129.5(2) . . ?
N3 C7 N4 109.9(3) . . ?
N3 C7 C8 123.0(2) . . ?
N4 C7 C8 127.0(3) . . ?
C9 C8 N6 122.9(3) . . ?
C9 C8 C7 118.0(3) . . ?
N6 C8 C7 118.9(3) . . ?
C8 C9 C10 118.8(4) . . ?
C11 C10 C9 119.8(4) . . ?
C10 C11 C12 118.7(4) . . ?
N6 C12 C11 123.7(4) . . ?
C18 C13 C14 118.5(4) . . ?
C15 C14 C13 120.0(5) . . ?
C15 C14 C20 119.0(5) . . ?
C13 C14 C20 121.0(5) . . ?
C14 C15 C16 122.0(5) . . ?
C15 C16 C17 119.7(5) . . ?
C15 C16 C20A 114.8(8) . . ?
C17 C16 C20A 122.5(8) . . ?
C18 C17 C16 116.9(5) . . ?
C17 C18 C13 122.9(3) . . ?
C17 C18 N4 118.2(4) . . ?
C13 C18 N4 118.7(3) . . ?
N5 C19 S1 178.2(4) . . ?

_diffrn_measured_fraction_theta_max    0.996
_diffrn_reflns_theta_full              25.01
_diffrn_measured_fraction_theta_full   0.996
_refine_diff_density_max    0.315
_refine_diff_density_min   -0.318
_refine_diff_density_rms    0.061

#===END
